# Supplementary material for: Benzodiazepines and risk of all cause mortality in adults: cohort study
Source: PubMed Central journal article supplement — BMJ. 2017 Jul 6;358:j2941. doi: 10.1136/bmj.j2941 (PMC5499256; doi:10.1136/bmj.j2941), 2017-07-06
Supplement: pate036319.ww1.pdf [file pate036319.ww1.pdf]

## Appendix

**eTable 1. List of Benzodiazepines Included in the Study**

|                        |                                                                                                                                                                  |
|------------------------|------------------------------------------------------------------------------------------------------------------------------------------------------------------|
| <b>Benzodiazepines</b> | Alprazolam, Chlordiazepoxide, Clobazam, Clonazepam, Clorazepate, Diazepam, Estazolam, Flurazepam, Lorazepam, Midazolam, Oxazepam, Quazepam, Triazolam, Temazepam |
|------------------------|------------------------------------------------------------------------------------------------------------------------------------------------------------------|

**eTable 2. Complete list of baseline characteristics of study participants before and after high-dimensional propensity score matching**

|                                             | Before PS-matching          |                                 |      | After PS-matching           |                                 |      |
|---------------------------------------------|-----------------------------|---------------------------------|------|-----------------------------|---------------------------------|------|
| Characteristic                              | BZD Initiators<br>1,686,410 | BZD Non-initiators<br>1,930,159 | ASD  | BZD Initiators<br>1,252,988 | BZD Non-initiators<br>1,252,988 | ASD  |
|                                             | Mean (SD) or %              |                                 |      | Mean (SD) or %              |                                 |      |
| <b>Demographics</b>                         |                             |                                 |      |                             |                                 |      |
| Age                                         | 46.4 (13.8)                 | 43.6 (14.6)                     | 0.20 | 46.0 (13.8)                 | 45.2 (14.6)                     | 0.06 |
| Male sex                                    | 31.7                        | 39.9                            | 0.17 | 35.1                        | 34.6                            | 0.01 |
| Index year                                  |                             |                                 |      |                             |                                 |      |
| 2004                                        | 6.8                         | 6.8                             | 0.00 | 7.1                         | 7.1                             | 0.00 |
| 2005                                        | 12.1                        | 11.8                            | 0.01 | 12.1                        | 12.1                            | 0.00 |
| 2006                                        | 11.1                        | 11.0                            | 0.00 | 11.1                        | 11.1                            | 0.00 |
| 2007                                        | 10.7                        | 10.7                            | 0.00 | 10.7                        | 10.7                            | 0.00 |
| 2008                                        | 11.0                        | 11.1                            | 0.00 | 11.1                        | 11.1                            | 0.00 |
| 2009                                        | 10.7                        | 10.8                            | 0.00 | 10.7                        | 10.7                            | 0.00 |
| 2010                                        | 9.7                         | 9.6                             | 0.00 | 9.7                         | 9.7                             | 0.00 |
| 2011                                        | 9.7                         | 9.8                             | 0.00 | 9.6                         | 9.6                             | 0.00 |
| 2012                                        | 9.3                         | 9.3                             | 0.00 | 9.2                         | 9.2                             | 0.00 |
| 2013                                        | 8.9                         | 9.0                             | 0.00 | 8.7                         | 8.7                             | 0.00 |
| <b>Comorbidities and life style factors</b> |                             |                                 |      |                             |                                 |      |
| Charlson comorbidity score                  | 0.5 (1.2)                   | 0.4 (0.9)                       | 0.18 | 0.5 (1.1)                   | 0.4 (1.0)                       | 0.01 |
| Smoking                                     | 5.6                         | 3.7                             | 0.09 | 4.5                         | 4.5                             | 0.00 |
| Obesity or overweight                       | 4.6                         | 3.9                             | 0.03 | 4.3                         | 4.2                             | 0.00 |
| Hypertension                                | 27.8                        | 22.0                            | 0.13 | 25.6                        | 26.0                            | 0.01 |
| Congestive heart failure                    | 1.7                         | 1.1                             | 0.05 | 1.4                         | 1.4                             | 0.00 |
| Ischemic heart disease                      | 5.6                         | 3.9                             | 0.08 | 4.9                         | 5.0                             | 0.00 |
| Coronary revascularization                  | 1.2                         | 0.9                             | 0.03 | 1.1                         | 1.1                             | 0.00 |
| Atherosclerosis                             | 0.5                         | 0.3                             | 0.03 | 0.4                         | 0.4                             | 0.00 |
| Disrhythmia                                 | 4.4                         | 3.0                             | 0.07 | 3.7                         | 3.7                             | 0.00 |
| Cerebrovascular disease                     | 1.9                         | 1.1                             | 0.07 | 1.5                         | 1.4                             | 0.01 |
| Venous thromboembolism                      | 1.3                         | 0.9                             | 0.04 | 1.1                         | 1.0                             | 0.01 |
| Peripheral vascular disease                 | 1.2                         | 0.8                             | 0.04 | 1.1                         | 1.1                             | 0.00 |
| Other cardiovascular diseases               | 6.1                         | 4.1                             | 0.09 | 5.1                         | 5.1                             | 0.00 |
| Hyperlipidemia                              | 26.2                        | 22.1                            | 0.10 | 24.8                        | 25.2                            | 0.01 |
| Diabetes                                    | 9.7                         | 8.9                             | 0.03 | 9.6                         | 9.7                             | 0.00 |
| COPD                                        | 3.3                         | 1.9                             | 0.09 | 2.6                         | 2.5                             | 0.01 |
| Asthma                                      | 6.0                         | 4.4                             | 0.07 | 5.2                         | 5.2                             | 0.00 |
| Pneumonia                                   | 1.9                         | 1.3                             | 0.05 | 1.6                         | 1.6                             | 0.00 |
| Sepsis                                      | 0.4                         | 0.3                             | 0.02 | 0.4                         | 0.3                             | 0.02 |
| Osteoarthritis                              | 7.0                         | 4.9                             | 0.09 | 6.0                         | 6.1                             | 0.00 |
| Rheumathoid arthritis                       | 1.1                         | 0.8                             | 0.03 | 1.0                         | 1.0                             | 0.00 |
| Other OA and MSK                            | 29.0                        | 22.8                            | 0.14 | 25.9                        | 25.9                            | 0.00 |
| Neuropathic pain                            | 12.0                        | 7.4                             | 0.16 | 9.5                         | 9.5                             | 0.00 |
| Back pain                                   | 22.7                        | 14.8                            | 0.20 | 18.6                        | 18.6                            | 0.00 |

|                                     | Before PS-matching          |                                 |      | After PS-matching           |                                 |      |
|-------------------------------------|-----------------------------|---------------------------------|------|-----------------------------|---------------------------------|------|
| Characteristic                      | BZD Initiators<br>1,686,410 | BZD Non-initiators<br>1,930,159 | ASD  | BZD Initiators<br>1,252,988 | BZD Non-initiators<br>1,252,988 | ASD  |
|                                     | Mean (SD) or %              |                                 |      | Mean (SD) or %              |                                 |      |
| Fibromyalgia                        | 5.2                         | 3.1                             | 0.11 | 4.0                         | 3.9                             | 0.01 |
| Osteoporosis                        | 2.0                         | 1.3                             | 0.05 | 1.7                         | 1.7                             | 0.00 |
| Fractures                           | 2.7                         | 2.4                             | 0.02 | 2.5                         | 2.4                             | 0.01 |
| Falls                               | 0.8                         | 0.6                             | 0.02 | 0.7                         | 0.7                             | 0.00 |
| Kidney disease                      | 3.4                         | 2.4                             | 0.06 | 2.9                         | 2.9                             | 0.00 |
| Liver disease                       | 3.3                         | 2.1                             | 0.07 | 2.6                         | 2.6                             | 0.00 |
| Gastrointestinal disorders          | 3.3                         | 2.5                             | 0.05 | 2.9                         | 2.9                             | 0.00 |
| Blood disorders                     | 8.9                         | 6.5                             | 0.09 | 7.6                         | 7.6                             | 0.00 |
| Headache                            | 8.6                         | 5.3                             | 0.13 | 6.7                         | 6.6                             | 0.00 |
| Migraine                            | 4.6                         | 2.5                             | 0.11 | 3.4                         | 3.3                             | 0.01 |
| Epilepsy or convulsions             | 1.5                         | 0.8                             | 0.07 | 1.1                         | 1.0                             | 0.01 |
| Dementia                            | 0.9                         | 0.5                             | 0.05 | 0.7                         | 0.6                             | 0.01 |
| Parkinson's disease                 | 0.2                         | 0.1                             | 0.03 | 0.2                         | 0.2                             | 0.00 |
| Cancer                              | 11.4                        | 7.6                             | 0.13 | 9.5                         | 9.6                             | 0.00 |
| Frailty <sup>1</sup>                | 1.2                         | 0.7                             | 0.05 | 1.0                         | 1.0                             | 0.00 |
| Anxiety                             | 14.3                        | 4.7                             | 0.33 | 7.9                         | 7.0                             | 0.03 |
| Insomnia                            | 5.7                         | 2.1                             | 0.19 | 3.5                         | 3.1                             | 0.02 |
| Other sleep disorders               | 5.3                         | 3.4                             | 0.09 | 4.4                         | 4.2                             | 0.01 |
| Depression                          | 16.3                        | 8.0                             | 0.26 | 11.5                        | 11.1                            | 0.01 |
| Bipolar disorder                    | 2.3                         | 0.9                             | 0.11 | 1.4                         | 1.3                             | 0.01 |
| Psychosis                           | 0.7                         | 0.3                             | 0.06 | 0.4                         | 0.4                             | 0.00 |
| Delirium                            | 0.7                         | 0.3                             | 0.06 | 0.5                         | 0.4                             | 0.01 |
| Drug or alcohol abuse               | 2.2                         | 1.2                             | 0.08 | 1.6                         | 1.5                             | 0.01 |
| Other psychiatric conditions        | 5.2                         | 3.2                             | 0.10 | 4.1                         | 3.9                             | 0.01 |
| <b>Medications</b>                  |                             |                                 |      |                             |                                 |      |
| ACE inhibitors                      | 12.3                        | 11.3                            | 0.03 | 12.3                        | 12.5                            | 0.01 |
| Angiotensin II receptor blockers    | 8.0                         | 6.3                             | 0.07 | 7.6                         | 7.6                             | 0.00 |
| Beta-blockers                       | 14.1                        | 10.5                            | 0.11 | 13.0                        | 12.9                            | 0.00 |
| Calcium channel blockers            | 8.6                         | 10.5                            | 0.06 | 8.1                         | 8.4                             | 0.01 |
| Thiazide diuretics                  | 4.9                         | 4.0                             | 0.04 | 4.6                         | 5.0                             | 0.02 |
| Loop diuretics                      | 3.3                         | 2.1                             | 0.07 | 2.8                         | 2.8                             | 0.00 |
| Nitrates                            | 1.5                         | 1.0                             | 0.05 | 1.3                         | 1.3                             | 0.00 |
| Other antihypertensives             | 3.3                         | 2.4                             | 0.05 | 3.0                         | 3.0                             | 0.00 |
| Digoxin                             | 0.7                         | 0.5                             | 0.03 | 0.6                         | 0.6                             | 0.00 |
| Antiarrhythmics                     | 0.6                         | 0.4                             | 0.03 | 0.5                         | 0.5                             | 0.00 |
| Anticoagulants                      | 2.3                         | 1.8                             | 0.04 | 2.1                         | 2.1                             | 0.00 |
| Antiplatelets                       | 2.3                         | 1.7                             | 0.04 | 2.1                         | 2.2                             | 0.01 |
| Non-insulin glucose-lowering agents | 7.1                         | 6.9                             | 0.01 | 7.1                         | 7.8                             | 0.03 |
| Insulin                             | 2.1                         | 1.9                             | 0.01 | 2.0                         | 2.2                             | 0.01 |
| Lipid-lowering agents               | 20.9                        | 18.2                            | 0.07 | 20.2                        | 20.9                            | 0.02 |
| COPD/Asthma therapy                 | 9.9                         | 7.7                             | 0.08 | 8.8                         | 9.1                             | 0.01 |
| Oral corticosteroids                | 13.5                        | 9.6                             | 0.12 | 11.4                        | 11.7                            | 0.01 |
| DMARDs                              | 2.2                         | 1.6                             | 0.04 | 1.9                         | 2.0                             | 0.01 |
| NSAIDs                              | 17.7                        | 14.9                            | 0.08 | 15.9                        | 17.1                            | 0.03 |

|                                              | Before PS-matching          |                                 |      | After PS-matching           |                                 |      |
|----------------------------------------------|-----------------------------|---------------------------------|------|-----------------------------|---------------------------------|------|
| Characteristic                               | BZD Initiators<br>1,686,410 | BZD Non-initiators<br>1,930,159 | ASD  | BZD Initiators<br>1,252,988 | BZD Non-initiators<br>1,252,988 | ASD  |
|                                              | Mean (SD) or %              |                                 |      | Mean (SD) or %              |                                 |      |
| COX-2 selective inhibitors                   | 2.9                         | 1.9                             | 0.07 | 2.5                         | 2.4                             | 0.01 |
| Opioids                                      | 35.0                        | 24.0                            | 0.24 | 30.1                        | 28.8                            | 0.03 |
| Bisphosphonates                              | 2.8                         | 2.0                             | 0.05 | 2.5                         | 2.7                             | 0.01 |
| Anticonvulsants                              | 8.8                         | 4.2                             | 0.19 | 6.1                         | 5.9                             | 0.01 |
| Anti-migraine agents                         | 4.2                         | 2.3                             | 0.11 | 3.3                         | 3.0                             | 0.02 |
| Antiparkinson therapy                        | 1.1                         | 0.5                             | 0.07 | 0.7                         | 0.7                             | 0.00 |
| Dementia therapy                             | 0.5                         | 0.2                             | 0.05 | 0.4                         | 0.3                             | 0.02 |
| SSRIs                                        | 22.4                        | 11.6                            | 0.29 | 19.1                        | 15.1                            | 0.11 |
| SNRIs                                        | 6.8                         | 2.9                             | 0.18 | 5.2                         | 4.0                             | 0.06 |
| TCAs                                         | 3.4                         | 1.7                             | 0.11 | 2.6                         | 2.3                             | 0.02 |
| Other antidepressants                        | 9.7                         | 4.4                             | 0.21 | 7.6                         | 6.0                             | 0.06 |
| Other hypnotics                              | 11.6                        | 4.3                             | 0.27 | 8.0                         | 6.1                             | 0.07 |
| Other anxiolytics                            | 2.2                         | 0.9                             | 0.11 | 1.6                         | 1.2                             | 0.03 |
| Lithium                                      | 0.5                         | 0.2                             | 0.05 | 0.3                         | 0.3                             | 0.00 |
| Antipsychotics                               | 2.7                         | 1.1                             | 0.12 | 1.7                         | 1.6                             | 0.01 |
| Barbiturates                                 | 2.3                         | 1.1                             | 0.09 | 1.8                         | 1.4                             | 0.03 |
| <b>Indicators of health care utilization</b> |                             |                                 |      |                             |                                 |      |
| Any hospitalization                          | 10.4                        | 6.9                             | 0.12 | 8.1                         | 7.9                             | 0.01 |
| No. hospital days                            | 0.8 (4.2)                   | 0.5 (3.1)                       | 0.09 | 0.6 (3.4)                   | 0.6 (3.6)                       | 0.00 |
| No. physician visits                         | 4.0 (3.6)                   | 2.9 (2.9)                       | 0.31 | 3.4 (3.2)                   | 3.4 (3.1)                       | 0.00 |
| No. prescription drugs                       | 5.9 (4.0)                   | 4.3 (3.1)                       | 0.43 | 5.1 (3.6)                   | 5.1 (3.4)                       | 0.01 |
| Psychiatric visit                            | 22.7                        | 10.9                            | 0.32 | 15.9                        | 14.6                            | 0.04 |
| Psychiatric hospitalization                  | 0.9                         | 0.3                             | 0.08 | 0.5                         | 0.5                             | 0.00 |
| No. ICD9 diagnoses, 3rd digit level          | 9.3 (7.4)                   | 7.0 (6.0)                       | 0.35 | 8.0 (6.5)                   | 8.0 (6.4)                       | 0.00 |
| No. cardiograms                              | 0.3 (0.8)                   | 0.2 (0.6)                       | 0.15 | 0.2 (0.7)                   | 0.2 (0.7)                       | 0.00 |

PS: propensity score, BZD: Benzodiazepine, ASD: Absolute standardized difference, COPD: Chronic obstructive pulmonary disease, OA: Osteoarthritis, MSK: Musculoskeletal disorder, ACE: Angiotensin-converting-enzyme, DMARDs: disease-modifying anti-rheumatic drugs, NSAIDs: non-steroidal anti-inflammatory drugs, COX-2: cyclooxygenase-2, SSRIs: selective serotonin reuptake inhibitors, SNRIs: norepinephrine reuptake inhibitors, TCAs: tricyclic antidepressants.

<sup>†</sup>Frailty was defined as a diagnostic code for urinary incontinence, decubitus ulcer, or oxygen use

**eTable 3. Classification of Long-Acting and Short-Acting Benzodiazepines\***

| <b>Long-acting agents</b> | <b>Short-acting agents</b> |
|---------------------------|----------------------------|
| Chlordiazepoxide          | Alprazolam                 |
| Clobazam                  | Midazolam                  |
| Clorazepate               | Triazolam                  |
| Diazepam                  | Clonazepam                 |
| Flurazepam                | Estazolam                  |
| Quazepam                  | Lorazepam                  |
|                           | Oxazepam                   |
|                           | Temazepam                  |

\*Long-acting BZDs are agents with half-life  $\geq$  24 hours

**eFigure 1. Study Diagram**

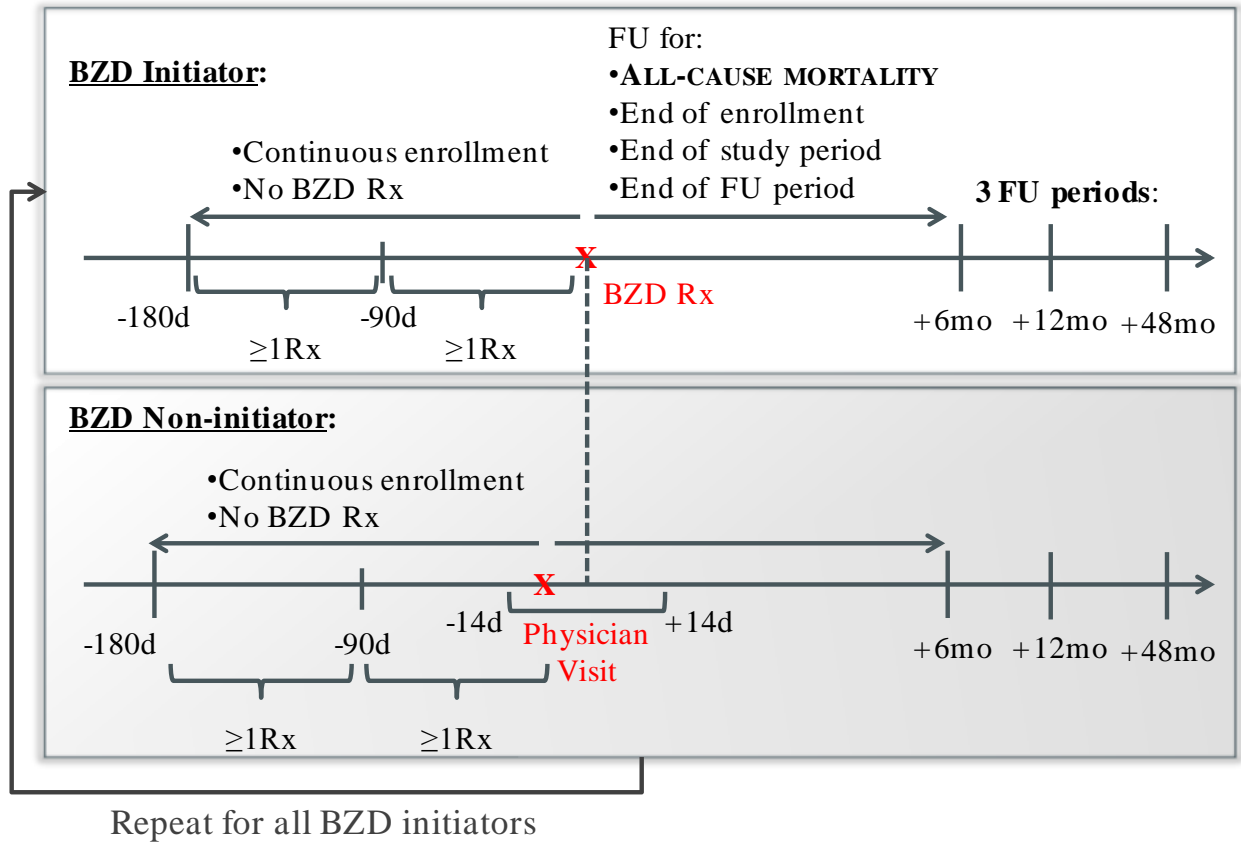

BZD: Benzodiazepine, FU: Follow-up, Rx: Filled prescription, mo: Month
